# Supplementary material
Source: MDPI journal article supplement (https://www.mdpi.com/2227-9717/11/7/2146)
Supplement: s1 [file s1]

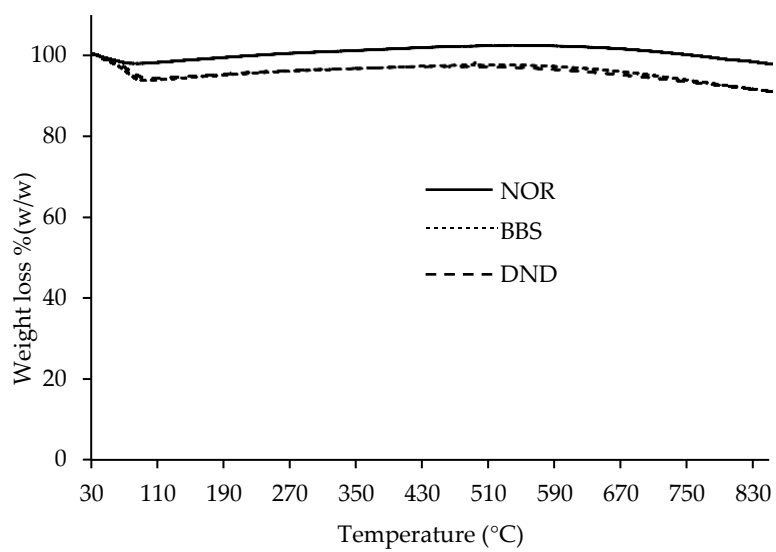

**Figure S1.** TGA curves of the carbons (BBS: babassu-derived carbon; DND: dende-derived carbon; NOR: commercial activated carbon).

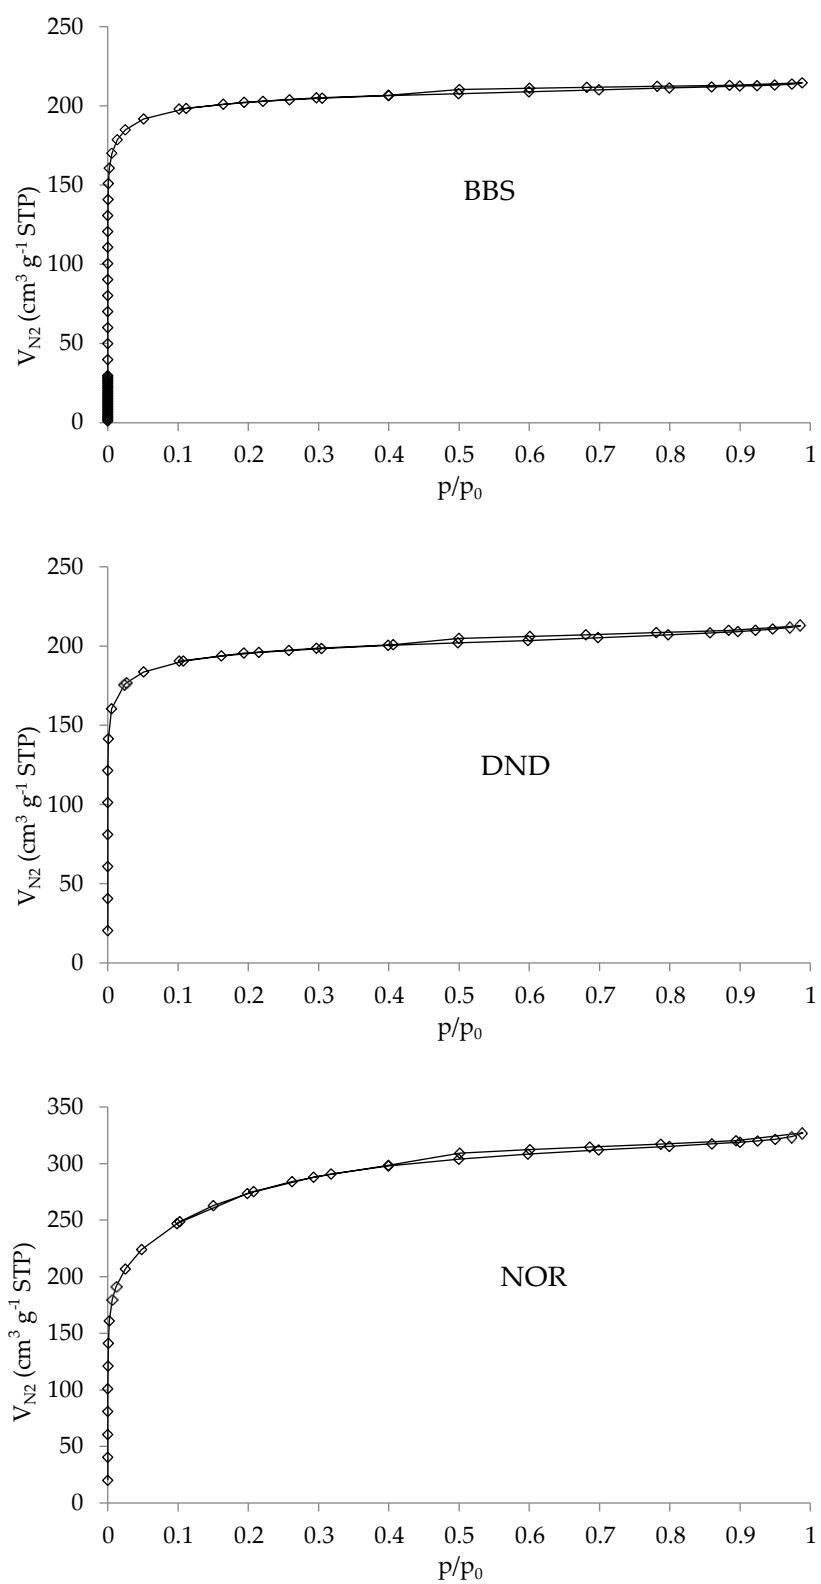

**Figure S2.**  $\text{N}_2$  adsorption–desorption isotherms at 77 K of the carbons (BBS: babassu-derived carbon; DND: dende-derived carbon; NOR: commercial activated carbon).

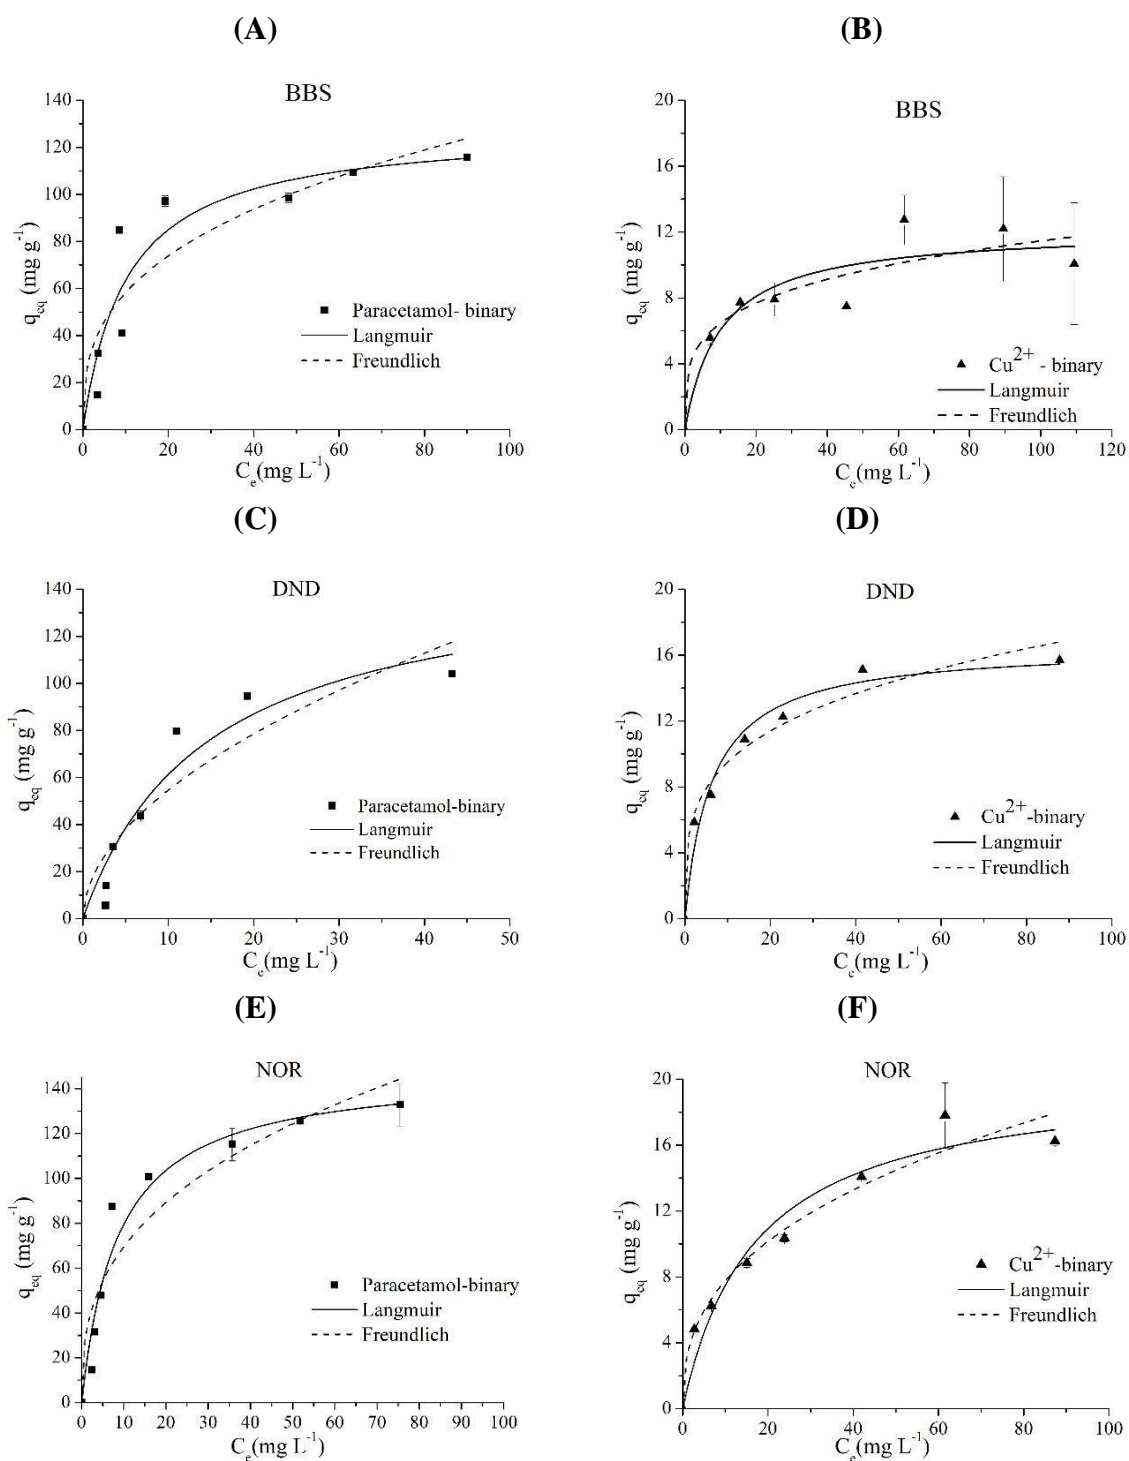

**Figure S3.** Experimental data and fitting to the Langmuir and Freundlich isotherm models for paracetamol and  $\text{Cu}^{2+}$  adsorption in binary systems (A, C, and E: paracetamol adsorption in a binary system with BBS, DND, and NOR, respectively; B, D, and F:  $\text{Cu}^{2+}$  adsorption in a binary system with BBS, DND, and NOR, respectively; BBS: babassu; DND: dende; NOR: Norit).

**Table S1.** Kinetic parameters from PSO kinetic model for single and binary adsorption experiments.

| Adsorbent | Experimental/<br>PSO model | Parameters                                           | Adsorption           |                  |                      |                      |
|-----------|----------------------------|------------------------------------------------------|----------------------|------------------|----------------------|----------------------|
|           |                            |                                                      | Single               |                  | Binary               |                      |
|           |                            |                                                      | Paracetamol          | Cu <sup>2+</sup> | Paracetamol          | Cu <sup>2+</sup>     |
| BBS       | Exp.                       | q <sub>e</sub> (exp) (mg g <sup>-1</sup> )           | 90.4                 | 6.90             | 89.9                 | 6.70                 |
|           | PSO                        | q <sub>e</sub> (mg g <sup>-1</sup> )                 | 87.6                 | 3.80             | 86.4                 | 6.40                 |
|           |                            | k <sub>2</sub> (g mg <sup>-1</sup> h <sup>-1</sup> ) | 4.8×10 <sup>-4</sup> | 0.400            | 0.010                | 8.9×10 <sup>-4</sup> |
|           |                            | R <sup>2</sup>                                       | 0.990                | 0.460            | 0.980                | 0.980                |
|           |                            | χ <sup>2</sup>                                       | 9.76                 | 2.26             | 26.6                 | 0.10                 |
|           |                            | AIC                                                  | 32.3                 | 20.5             | 37.0                 | n.c.                 |
|           |                            | Removal (%)                                          | 89.0                 | 6.00             | 86.0                 | 6.00                 |
| DND       | Exp.                       | q <sub>e</sub> (exp) (mg g <sup>-1</sup> )           | 94.2                 | 4.60             | 88.6                 | 4.80                 |
|           | PSO                        | q <sub>e</sub> (mg g <sup>-1</sup> )                 | 89.4                 | 3.30             | 86.0                 | 4.20                 |
|           |                            | k <sub>2</sub> (g mg <sup>-1</sup> h <sup>-1</sup> ) | 5.6×10 <sup>-4</sup> | 0.300            | 3.6×10 <sup>-4</sup> | 0.300                |
|           |                            | R <sup>2</sup>                                       | 0.970                | 0.400            | 0.980                | 0.930                |
|           |                            | χ <sup>2</sup>                                       | 28.8                 | 1.64             | 14.2                 | 0.16                 |
|           |                            | AIC                                                  | 44.2                 | 15.1             | 36.4                 | -0.79                |
|           |                            | Removal (%)                                          | 88.0                 | 4.00             | 85.0                 | 4.00                 |
| NOR       | Exp.                       | q <sub>e</sub> (exp) (mg g <sup>-1</sup> )           | 95.2                 | 5.20             | 94.4                 | 5.40                 |
|           | PSO                        | q <sub>e</sub> (mg g <sup>-1</sup> )                 | 94.8                 | 3.80             | 94.5                 | 3.80                 |
|           |                            | k <sub>2</sub> (g mg <sup>-1</sup> h <sup>-1</sup> ) | 1.8×10 <sup>-3</sup> | 0.300            | 0.001                | 0.200                |
|           |                            | R <sup>2</sup>                                       | 0.990                | 0.750            | 0.990                | 0.390                |
|           |                            | χ <sup>2</sup>                                       | 4.64                 | 0.64             | 6.72                 | 1.88                 |
|           |                            | AIC                                                  | 24.1                 | 8.54             | 26.8                 | 14.1                 |
|           |                            | Removal (%)                                          | 95.0                 | 4.00             | 91.0                 | 5.00                 |

PSO: pseudo-second-order kinetic model; n.c.: not calculated
